1 **Inhibition of *N*-myristoyltransferase Promotes Naive Pluripotency in Mouse and**  
2 **Human Pluripotent Stem Cells**

3

4 Junko Yoshida<sup>1,2</sup>, Hitomi Watanabe<sup>3</sup>, Kaori Yamauchi<sup>4,13</sup>, Takumi Nishikubo<sup>1</sup>, Ayako  
5 Isotani<sup>5,6</sup>, Satoshi Ohtsuka<sup>7,8</sup>, Hitoshi Niwa<sup>7,9</sup>, Hidenori Akutsu<sup>10</sup>, Akihiro Umezawa<sup>10</sup>,  
6 Hirofumi Suemori<sup>4</sup>, Yasuhiro Takashima<sup>11</sup>, Gen Kondoh<sup>3</sup>, Junji Takeda<sup>2,12,\*</sup>, and  
7 Kyoji Horie<sup>1,2,\*</sup>

8

9 <sup>1</sup> Department of Physiology II, Nara Medical University, 840 Shijo-cho, Kashihara,  
10 Nara 634-8521, Japan

11 <sup>2</sup> Department of Genome Biology, Graduate School of Medicine, Osaka University,  
12 2-2 Yamadaoka, Suita, Osaka 565-0871, Japan

13 <sup>3</sup> Laboratory of Integrative Biological Science, Institute for Frontier Life and Medical  
14 Sciences, Kyoto University, 53 Shogoin Kawahara-cho, Sakyo-ku, Kyoto 606-8507,  
15 Japan

16 <sup>4</sup> Laboratory of Embryonic Stem Cell Research, Institute for Frontier Life and Medical  
17 Sciences, Kyoto University, 53 Shogoin Kawahara-cho, Sakyo-ku, Kyoto 606-8507,  
18 Japan

19 <sup>5</sup> Genome Information Research Center, Research Institute for Microbial Diseases,  
20 Osaka University, 3-1 Yamadaoka, Suita, Osaka 565-0871, Japan

21 <sup>6</sup> Division of Biological Science, Graduate School of Science and Technology, Nara  
22 Institute of Science and Technology, 8916-5 Takayama-cho, Ikoma, Nara 630-0192,  
23 Japan

24 <sup>7</sup> Pluripotent Stem Cell Studies, RIKEN Center for Developmental Biology, 2-2-3

25 Minatojima-minamimachi, Chuo-ku, Kobe, Hyogo 650-0047, Japan

26 <sup>8</sup> Laboratory for Experimental Animals, Kyoto Prefectural University of Medicine,

27 465 Kajii-cho, Kamigyo-ku, Kyoto 602-8566, Japan

28 <sup>9</sup> Department of Pluripotent Stem Cell Biology, Institute of Molecular Embryology

29 and Genetics, Kumamoto University, 2-2-1 Honjo, Chuo-ku, Kumamoto 860-0811,

30 Japan

31 <sup>10</sup> Center for Regenerative Medicine, National Center for Child Health and

32 Development, 2-10-1 Okura, Setagaya-ku, Tokyo 157-8535, Japan

33 <sup>11</sup> Department of Life Science Frontiers, Center for iPS Cell Research and Application

34 (CiRA), Kyoto University, 53 Shogoin Kawahara-cho, Sakyo-ku, Kyoto 606-8507,

35 Japan

36 <sup>12</sup> Yabumoto Department of Intractable Disease Research, Research Institute for

37 Microbial Diseases, Osaka University, 3-1 Yamadaoka, Suita, Osaka 565-0871, Japan

38 <sup>13</sup> Present address: GlycoTechnica Ltd., 101 Hirano Bldg.3, 5-28-6 Utsukushigaoka,

39 Aoba-ku, Yokohama, Kanagawa 225-0002, Japan

40

41 \*Correspondence: [jjjtakeda@biken.osaka-u.ac.jp](mailto:jjjtakeda@biken.osaka-u.ac.jp) (J.T.), [k-horie@narmed-u.ac.jp](mailto:k-horie@narmed-u.ac.jp)

42 (K.H.)

43

## 44 SUMMARY

45 Naive and primed states are distinct states of pluripotency during early embryonic  
46 development that can be captured and converted to each other *in vitro*. To elucidate  
47 the regulatory mechanism of pluripotency, we performed a recessive genetic screen of  
48 homozygous mutant mouse embryonic stem cells (mESCs) and found that suppression  
49 of *N*-myristoyltransferase (Nmt) promotes naive pluripotency. Disruption of *Nmt1* in  
50 mESCs conferred resistance to differentiation. Suppression of Nmt in mouse epiblast  
51 stem cells (mEpiSCs) promoted the conversion from the primed to the naive state.  
52 This effect was independent of Src, which is a major substrate of Nmt and is known to  
53 promote differentiation of mESCs. Suppression of Nmt in naive-state human induced  
54 pluripotent stem cells (hiPSCs) increased the expression of the naive-state marker.  
55 These results indicate that Nmt is a novel target for the regulation of naive  
56 pluripotency conserved between mice and humans.

## 58 INTRODUCTION

59 Pluripotency is the potential to differentiate into three primary germ cell layers, and  
60 subsequently, adult tissues. Over recent decades, various approaches have been used  
61 to capture the pluripotent state in cell cultures<sup>1</sup>. Interestingly, these efforts have  
62 revealed that distinct pluripotent states can be established, both in mice and humans.  
63 The most widely studied pluripotent states are naive and primed states. The naive state  
64 represents a pluripotent state in pre-implantation-stage embryos from which mESCs  
65 are derived<sup>2,3</sup>, and the primed state corresponds to post-implantation-stage embryos,  
66 from which mEpiSCs are established<sup>4,5</sup>. In contrast, human embryonic stem cells

67 (hESCs) were in the primed state under conventional culture conditions, despite being  
68 derived from pre-implantation embryos<sup>6</sup>. Human induced pluripotent stem cells  
69 (hiPSCs) were also in the primed state when established under the conventional hESC  
70 culture media<sup>7, 8</sup>. Subsequently, naive-state hESCs/hiPSCs were established either by  
71 controlling signaling pathways with chemicals or through transient expression of  
72 transcription factors<sup>9, 10</sup>. Elucidation of the mechanisms involved in regulating distinct  
73 states of pluripotency will provide clues for understanding the nature of pluripotency  
74 and its application in regenerative medicine.

75 We previously reported a method for the systematic generation of homozygous  
76 mutant mESCs, which entails the conversion of heterozygosity to homozygosity by  
77 transient inactivation of the Bloom's syndrome gene (*Blm*)<sup>11</sup>. We extended this work  
78 and generated nearly 200 homozygous mutant mESC lines, especially for those genes  
79 with unknown functions. Through phenotypic screening of these homozygous mutant  
80 mESCs, we found that *Nmt1*-homozygous mutant mESCs are resistant to  
81 differentiation. Nmt is an enzyme that catalyzes the addition of a myristoyl group to  
82 the N-terminal region of proteins<sup>12</sup>. The inhibition of Nmt activity promoted the  
83 conversion of primed-state mEpiSCs into the naive state. Furthermore, the naive state  
84 of the hiPSCs was enhanced by an Nmt inhibitor, indicating that Nmt is an  
85 evolutionally conserved target for the regulation of naive pluripotency.

86

## 87 **RESULTS**

### 88 **Disruption of Nmt1 Confers Differentiation Resistance to mESCs and Enhances** 89 **the Properties of the Naive State**

90 As one of the phenotypic screenings of our homozygous mutant mESC clones<sup>11</sup>, we  
91 sparsely plated each mESC clone on mouse embryonic fibroblasts (MEF) in  
92 serum-containing medium, obtained single cell-derived colonies, and assessed their  
93 morphology. Flat or small-sized colonies were occasionally observed in wild-type  
94 (*Wt*) mESCs (Fig. 1A). In contrast, *Nmt1*-homozygous mutant mESCs formed  
95 homogeneous colonies with round and dome shapes (Fig. 1A), suggesting that  
96 *Nmt1*-homozygous mutant mESCs are resistant to differentiation. To address this  
97 possibility, we maintained *Nmt1*-homozygous mutant mESCs in serum-containing  
98 medium without MEF feeder cells. From *Wt* mESCs, differentiated cells, such as  
99 enlarged cells with a decrease in the pluripotency marker Oct3/4, were prominent (Fig.  
100 1B, left, arrowheads). In contrast, *Nmt1*-homozygous mutant mESCs formed tightly  
101 packed colonies that were Oct3/4-positive, even without MEFs (Fig. 1B, right),  
102 indicating a differentiation-resistant phenotype. To confirm that *Nmt1* mutation is  
103 responsible for this phenotype, we removed the gene trap vector sequence using  
104 Flp/*FRT* recombination to obtain revertant clones, using the protocol that we reported  
105 previously (Fig. 1C, top)<sup>11</sup>. The differentiation-resistant phenotype was abolished, as  
106 determined by the reduced number of alkaline phosphatase (ALP)-positive colonies  
107 (Fig. 1C, middle and bottom), demonstrating that *Nmt1* mutation is responsible for the  
108 differentiation-resistant phenotype. We also generated single cell-derived mESC  
109 colonies in serum-free N2B27 medium in the presence of 2i (inhibitors of MEK and  
110 GSK3) without LIF. The naive state of mESCs is stabilized under the serum-free 2i  
111 condition, which is called the ground state condition<sup>13</sup>. Both *Wt* mESCs and  
112 *Nmt1*-homozygous mutant mESCs formed tightly packed, undifferentiated colonies

113 under the 2i condition (Fig. 1D). However, *Nmt1*-homozygous mutant mESCs were  
114 more dome-shaped than *Wt* mESCs (Fig. 1D). These results suggest that *Nmt1*  
115 deficiency not only confers differentiation resistance to mESCs but also promotes the  
116 naive state.

117

### 118 **Conversion of Primed-state mEpiSCs into mESC-like Naive-state Cells by an** 119 **Nmt Inhibitor**

120 Differentiation resistance as well as the promotion of the naive state observed in  
121 *Nmt1*-homozygous mutant mESCs (Fig. 1) suggests that inhibition of Nmt1 activity  
122 may facilitate the conversion of primed-state mEpiSCs into mESC-like naive-state  
123 cells. To test this possibility, we used an Nmt inhibitor, DDD85646<sup>14</sup>. This inhibitor  
124 was originally reported as a lead compound against Nmt of *Trypanosoma brucei*,  
125 which causes African sleeping sickness. To test whether DDD85646 inhibits  
126 mammalian Nmt, we expressed an *N*-myristoylation signal-containing Venus  
127 (myrVenus) reporter<sup>15</sup> in mESCs (Fig. 2A) and investigated the effect of DDD85646  
128 on myrVenus localization (Fig. 2B). myrVenus was preferentially localized at cell  
129 membranes in the absence of DDD85646, and this preference was disrupted by  
130 DDD85646 (Fig. 2B), indicating that DDD85646 inhibits Nmt activity.

131 Next, we tested whether the Nmt inhibitor facilitates the conversion of the  
132 primed-state mEpiSCs derived from post-implantation embryos into the mESC-like  
133 naive-state cells (Fig. 2C). There are distinct differences in the gene expression profile  
134 and growth conditions between mEpiSCs and mESCs. N2B27-based serum-free 2i  
135 medium supplemented with LIF (2i/LIF) is an optimal culture condition for

136 naive-state mESCs, whereas this condition does not support primed-state mEpiSCs<sup>4,5</sup>.  
137 Consistent with this idea, high levels of cell death and differentiation were observed in  
138 mEpiSCs under 2i/LIF (Fig. 2D, middle). A combination of 2i/LIF and the Nmt  
139 inhibitor DDD85646 also induced cell death and differentiation; however,  
140 dome-shaped mESC-like colonies appeared after one week (Fig. 2D, right). These  
141 dome-shaped colonies were positive for the pluripotency markers Oct3/4 and Nanog  
142 (Fig. 2E), suggesting that mEpiSCs were successfully converted into the mESC-like  
143 naive state cells. After replating, the cells were cultured under 2i/LIF without the Nmt  
144 inhibitor. The number of dome-shaped colonies was substantially greater when the  
145 cells were pretreated with the Nmt inhibitor (Fig. 2F). After picking each  
146 dome-shaped colony, we could establish mESC-like clones under 2i/LIF without the  
147 Nmt inhibitor (Fig. 2G). The gene expression pattern of these clones, named  
148 mEpi-iPSC clones, was similar to that of mESCs, with high levels of expression of the  
149 naive-state marker *Dppa3* and low levels of expression of the primed-state marker  
150 *Fgf5* (Fig. 2H), strongly suggesting that mEpi-iPSC clones were in the naive state. To  
151 further demonstrate the conversion to the naive state, we injected each mEpi-iPSC  
152 clone into pre-implantation mouse embryos (8-cell stage embryos or blastocysts) and  
153 generated chimeric mice. The efficiency of generating chimeric mice is extremely low  
154 when using mEpiSCs<sup>4,5</sup>; however, we successfully generated chimeric mice from six  
155 out of seven mEpi-iPSC clones (Fig. 2I; Supplementary Fig. 1). Furthermore, we  
156 could achieve germline transmission in four clones (Fig. 2I; Supplementary Fig. 1),  
157 confirming that these clones were in the naive state. These results indicate that the  
158 suppression of Nmt promotes the conversion of the primed state into the naive state.

159

160 **Validation of the Effect of Nmt1 Deficiency on the Primed to Naive Conversion**  
161 **by Conditional *Nmt1* Knockout**

162 To confirm that the effect of the Nmt inhibitor DDD85646 on the primed to naive  
163 conversion was not the off-target effect but the on-target effect, we genetically  
164 inactivated the *Nmt1* gene in the primed state and examined whether  
165 *Nmt1*-inactivation induces a naive state, as outlined in Fig. 3A. First, we manipulated  
166 the *Wt* allele of the *Nmt1*-mutant heterozygous mESC line and generated the floxed  
167 *Nmt1* allele (Fig. 3A; Supplementary Fig. 2). The parental mESC line of this mutant  
168 contains the *ERT2-iCre-ERT2* fusion recombinase gene at the *Rosa26* locus<sup>11, 16</sup>;  
169 therefore, the floxed *Nmt1* allele can be conditionally inactivated by  
170 4-hydroxytamoxifen (4HT). Next, we induced the *Nmt1*-floxed mESC line into the  
171 mEpiSC-like primed-state cell line using bFGF and activin A, according to the  
172 published protocol<sup>17</sup> (Fig. 3A). Last, we inactivated Nmt1 in the primed state using  
173 4HT and cultured under 2i/LIF to examine whether Nmt1-deficiency induces  
174 conversion of the primed state into the naive state. Deletion of *Nmt1* was confirmed  
175 by PCR analysis of the *Nmt1* locus (Fig. 3B) and reduced membrane localization of  
176 the myrVenus reporter (Fig. 3C). The elimination of membrane localization was not  
177 complete (Fig. 3C). There are two *Nmt* genes in mice, *Nmt1* and *Nmt2*, and Nmt2 is  
178 expressed in mouse blastocysts although the expression level is lower than Nmt1<sup>18</sup>.  
179 We speculate that the residual membrane localization of the myrVenus reporter (Fig.  
180 3C) is due to Nmt2 activity.



181 After continuous culture of mESCs under bFGF and activin A, we obtained  
182 mEpiSC-like flat colonies (Fig. 3D). mEpiSC-like features were confirmed by a  
183 decrease in the naive-state marker *Dppa3* and the induction of the primed-state marker  
184 *Fgf5* (Fig. 3E). We then inactivated the *Nmt1* gene with 4HT and induced conversion  
185 of the primed state to the naive state under 2i/LIF (Fig. 3F). ALP-positive  
186 dome-shaped colonies appeared by inactivating *Nmt1*, whereas no ALP-positive  
187 colonies were obtained in mock-treatment (Fig. 3G). The results were consistent with  
188 the observation in the *Nmt* inhibitor (Fig. 2F), demonstrating that *Nmt1* deficiency  
189 promotes conversion of the primed state to the naive state.

190

### 191 **The Effect of the *Nmt* Inhibitor on the Primed to Naive Conversion Is Not** 192 **Mediated by Src Signaling Pathways**

193 Next, we searched for the *Nmt* substrate associated with the regulation of naive  
194 pluripotency. Many proteins have been reported as substrates of *Nmt*<sup>12</sup>. Among them,  
195 we focused on Src for the following reasons. First, a Src inhibitor supports the  
196 maintenance of the naive state in mESCs and can replace the MEK inhibitor in  
197 serum-free 2i/LIF culture<sup>19</sup>. Second, a Src inhibitor was included in a chemical  
198 cocktail for establishing naive hESCs/hiPSCs<sup>10</sup>. Therefore, we considered that the  
199 effect of the *Nmt* inhibitor observed in our study could be mediated through the  
200 inhibition of Src kinase activity.

201 To test this possibility, we treated mEpiSCs with the Src inhibitor CGP77675<sup>19</sup>  
202 and compared the effect on primed to naive conversion with that of the *Nmt* inhibitor  
203 DDD85646 (Fig. 4A). According to the previous report<sup>19</sup>, the optimal concentration of

204 CGP77675 for maintaining the naive state in mESCs is 1.5  $\mu$ M. Therefore, we tested a  
205 wide range of concentrations, from 0.5 to 6  $\mu$ M, including the optimal concentration  
206 for mESCs (Figs. 4A and 4B). However, we observed almost no increase in the  
207 efficiency of primed to naive conversion (Fig. 4C). At high-range concentrations ( $\geq 4$   
208  $\mu$ M), we simply observed severe growth suppression (Fig. 4B). These results indicate  
209 that unknown factors other than Src kinase are responsible for the effect of the Nmt  
210 inhibitor on the primed to naive conversion.

211

### 212 **Inhibition of Nmt Promotes Naive State in hiPSCs**

213 To address whether the effect of the Nmt inhibitor observed in mouse cells is  
214 generally applicable to other species, we investigated the effect of the Nmt inhibitor  
215 on human pluripotent stem cells. We initially cultured primed-state hESCs/hiPSCs in  
216 2i medium supplemented with human LIF and the Nmt inhibitor. We then examined  
217 whether hESCs/hiPSCs are converted into the naive state as we observed in mouse  
218 cells. However, hESCs/hiPSCs differentiated gradually (Supplementary Figs. 3A and  
219 3B), and undifferentiated cells were lost after repeated passages (Supplementary Fig.  
220 3C). Therefore, simply adding the Nmt inhibitor to 2i/LIF does not support the naive  
221 state in human cells.

222 Several protocols have been reported that convert primed-state hESCs/hiPSCs  
223 into a naive state<sup>9, 10, 20</sup>. We therefore cultured naive hiPSCs in the presence of the Nmt  
224 inhibitor and investigated whether the Nmt inhibitor enhances the naive state. To  
225 quantitate the enhancement of the naive state, we utilized the EOS-GFP reporter,  
226 which is highly induced in the naive state<sup>9</sup>. We converted adipocyte-derived

227 primed-state hiPSCs containing the EOS-GFP reporter into a naive state on MEF  
228 feeder cells in t2iLGö medium<sup>20</sup> (Fig. 5A). We separated naive hiPSCs from MEFs by  
229 the expression of SUSD2, a naive state-specific cell surface marker<sup>21</sup> (Fig. 5B).  
230 SUSD2-positive hiPSCs showed heterogeneous expression of EOS-GFP (Fig. 5C),  
231 indicating that there is a heterogeneity in the naive state under our experimental  
232 condition. This result also suggests that the EOS-GFP is a more sensitive marker of  
233 the naive state than SUSD2.

234 We initially cultured naive hiPSCs under different concentrations of the Nmt  
235 inhibitor, between 30 nM and 60 nM, for 6-days. We observed a dose-dependent  
236 increase of the expression of the EOS-GFP (Fig. 5D), suggesting that the Nmt  
237 inhibitor promoted naive state. To validate this observation, we tested the effect of the  
238 Nmt inhibitor on a different naive hiPSC line. Since we observed a decreased growth  
239 rate in the presence of the Nmt inhibitor (1:2 vs. 1:3 split with or without the 60 nM  
240 inhibitor, respectively, every 3 days), we removed the inhibitor on day 7 and  
241 continued to culture until day 14 (Fig. 5E). The growth rate recovered after removing  
242 the inhibitor, and an increase in EOS-GFP expression was observed at day 14 in a  
243 dose-dependent manner (Fig. 5E). This result is consistent with the observation in  
244 mESCs in which the effect of the Nmt inhibitor was observed in a culture without the  
245 inhibitor (Figs. 2C, 2F and 4A-4C). We also tested the effect of the Nmt inhibitor at  
246 0.1  $\mu$ M. Although this concentration was effective in mouse cells for promoting  
247 conversion to the naive state (Figs. 2C and 4A), we observed severe growth  
248 retardation in naive hiPSCs. We therefore consider 60 nM as optimal for hiPSCs.

249 We next examined the long-term effect of the Nmt inhibitor. We used tt2iLGö

250 medium in which the concentration of the GSK3 inhibitor CHIR99021 was reduced  
251 from 1  $\mu$ M to 0.3  $\mu$ M, as this medium supports robust expansion of naive hiPSCs<sup>20</sup>.  
252 We set up three independent cultures with or without the Nmt inhibitor. At day 23, we  
253 quantified the expression of the EOS-GFP and confirmed that the induction of the  
254 EOS-GFP signal by the Nmt inhibitor was statistically significant (Fig 5F).

255 Taken together, the results indicate that suppression of Nmt enhances naive  
256 pluripotency in both mice and humans. The results also suggest the possibility that the  
257 Nmt inhibitor could be useful as a novel chemical for culturing naive-state  
258 hESCs/hiPSCs.

## 260 **DISCUSSION**

261 In the present study, we identified Nmt as a novel target for the regulation of the naive  
262 state in both mice and humans. Nmt catalyzes the attachment of 14 carbon fatty acid  
263 myristates to the N-terminal glycine residue of proteins<sup>12</sup>. The significance of  
264 myristoylation during early development is underscored by the embryonic lethality  
265 observed in *Nmt1* knockout mice<sup>18</sup>. One of the main consequences of protein  
266 myristoylation is membrane targeting, as myristoylated proteins acquire  
267 hydrophobicity. Various signaling molecules are myristoylated, resulting in the  
268 clustering of signaling molecules at the plasma membrane and stimulation of a wide  
269 range of signaling pathways<sup>12</sup>. Considering this observation, an attractive model for  
270 explaining the effect of Nmt suppression on the enhancement of the naive state is the  
271 shielding of cells from external differentiation-inducing stimuli by reducing the  
272 density of signaling molecules at the plasma membrane. This concept is similar to the

273 principle underlying the stabilization of the naive state by 2i inhibitors<sup>13</sup>. MEK, one of  
274 the targets of 2i, is an essential signal transducer in the FGF2-dependent  
275 differentiation pathway. Therefore, naive cells cultured in 2i medium are sequestered  
276 from a major differentiation stimulus<sup>13</sup>. Consistent with previous reports<sup>17, 22</sup>, our  
277 results indicated that 2i alone was insufficient for efficiently converting from the  
278 primed to the naive state (Figs. 2F and 3G). Furthermore, the dome-shaped colony  
279 morphology, which is a characteristic feature of naive cells, was enhanced by the  
280 addition of the Nmt inhibitor to the 2i medium, indicating a non-overlapping effect  
281 between MEK and Nmt inhibitors (Fig. 1D). These observations suggest that signaling  
282 pathways other than the FGF2-MEK axis are targeted by the Nmt inhibitor.

283 Src is a well-characterized substrate of Nmt and is known to promote  
284 differentiation of mESCs<sup>23, 24</sup>. Furthermore, the Src inhibitor CGP77675 stabilizes  
285 mESCs in the naive state<sup>19</sup>. Therefore, we initially hypothesized that Src is responsible  
286 for the conversion of the primed-state mEpiSCs to naive-state cells by Nmt  
287 suppression. However, the Src inhibitor did not enhance this conversion. This result  
288 indicated that other Nmt substrates are responsible for this conversion. Recent  
289 advances in proteomics have enabled global profiling of *N*-myristoylated proteomes,  
290 and more than 100 *N*-myristoylated proteins have been identified in HeLa cells<sup>25</sup>.  
291 Comparative profiling of *N*-myristoylated proteomes between naive and primed states  
292 may provide candidate *N*-myristoylated proteins regulating pluripotency.

293 Various roles other than plasma membrane targeting have been reported for  
294 myristoylation. A hydrophobic myristoyl moiety can alter protein folding and provide  
295 a novel interface for protein–protein interactions<sup>26, 27</sup>. The myristoylation of

296 proteasome components controls the shuttling of proteasome complexes between  
297 nucleus and cytoplasm, which regulates the degradation of misfolded proteins<sup>28</sup>.  
298 Several proteins involved in apoptosis are myristoylated following caspase-mediated  
299 cleavage, which can enhance or reduce the activity of each protein and influence the  
300 balance between cell death and survival<sup>29</sup>. These or other unknown mechanisms may  
301 be involved in the regulation of pluripotency observed in our study.

302 We observed increased expression of the naive-state marker EOS-GFP by the  
303 Nmt inhibitor. This result suggests that the use of the Nmt inhibitor may help expand  
304 the toolkit to modify the naive culture conditions for hESCs/hiPSCs. For example,  
305 ongoing attempts to generate hESC/hiPSC-derived donor organs via the formation of  
306 interspecies chimera formation<sup>30</sup> requires highly competent hESCs/hiPSCs, which  
307 may be achieved by modifying the culture conditions of hESCs/hiPSCs<sup>31</sup>. We consider  
308 that there is room to improve the efficacy and specificity of the Nmt inhibitor because  
309 our conditional *Nmt1*-knockout experiment gave superior results compared to the Nmt  
310 inhibitor in terms of the induction level of the naive cells from primed-state cells (Figs.  
311 2F and 3G). Recently, Nmt has attracted increasing attention as a therapeutic target in  
312 cancers, and new Nmt inhibitors are being developed accordingly<sup>12</sup>. The Nmt inhibitor  
313 used in the present study (DDD85646) was originally developed as a lead compound  
314 to target Nmt of *Trypanosoma brucei*<sup>14</sup> and is therefore unlikely an optimal inhibitor  
315 for mammalian Nmt. The newly developed inhibitors optimized for human Nmt may  
316 regulate pluripotent stem cells more effectively.

317

318

## 319 **METHODS**

### 320 **Cell Line and Cell Culture**

321 The *Nmt1* mutant mESC clone was obtained by the gene trap method previously  
322 described<sup>11</sup>. The retroviral gene trap vector was inserted at the first intron of the *Nmt1*  
323 gene. The flanking sequence of the insertion site is  
324 5'-ATCCCACGCTGGTCTCATTTGGACA-3'.

325 mESCs were cultured either in serum-containing medium or serum-free 2i  
326 medium depending on the purpose of the experiment. The serum-containing medium  
327 was composed of KnockOut DMEM (Cat. 10829018, Thermo Fisher Scientific)  
328 supplemented with 20% fetal bovine serum, non-essential amino acids (Cat. 11140050,  
329 Thermo Fisher Scientific), sodium pyruvate (Cat. 11360070, Thermo Fisher  
330 Scientific), 0.1 mM of 2-mercaptoethanol (Cat. M3148, Sigma) and 1,000 U/ml of  
331 leukemia inhibitory factor (LIF) (Cat. ESG1107, Merck Millipore), and mitomycin C  
332 (MMC)-treated MEFs were used as feeder cells. The serum-free 2i medium was  
333 composed of N2B27 supplemented with 1  $\mu$ M of MEK inhibitor PD0325901 (Cat.  
334 Axon1408, Axon Medchem) and 3  $\mu$ M of GSK3 inhibitor CHIR99021 (Cat.  
335 Axon1386, Axon Medchem). We routinely added LIF to the serum-free medium  
336 (2i/LIF), except for in the experiment shown in Fig. 1D.

337 mEpiSCs were cultured in DMED/F12 (Cat. 11320033, Thermo Fisher  
338 Scientific) supplemented with 20% KnockOut Serum Replacement (KSR) (Cat.  
339 10828028, Thermo Fisher Scientific), non-essential amino acids, sodium pyruvate, 0.1  
340 mM of 2-mercaptoethanol, 5 ng/ml of bFGF (Cat. 16100102, Katayama Chemical  
341 Industries) and 10 ng/ml of activin A (Cat. 120-14, PeproTech). MMC-treated MEFs

342 were used as feeder cells.

343 Naive-state hiPSCs were established from the primed state adipocyte-derived  
344 hiPSCs<sup>9</sup>. We first introduced the EOS-GFP reporter vector<sup>32</sup> into the primed-state  
345 hiPSCs and then induced conversion to the naive state by the protocol previously  
346 described<sup>20</sup>. Naive hiPSCs were maintained in 2iLGö medium, consisting of N2B27  
347 (Ndiff227; Cat. Y40002, Takara Bio) with 1 µM of PD0325901 (Cat. 4192, Tocris), 1  
348 µM of CHIR99021 (Cat. SML1046, Sigma-Aldrich), 10 ng/mL of recombinant human  
349 LIF (Cat. 300-05, Peprotech), and 2 µM of Gö6983 (Cat. 2285, Tocris), as previously  
350 described<sup>9</sup>. Naive hiPSCs were passaged every 3-5 days using Accutase (Cat. A6964,  
351 Sigma-Aldrich).

352 The primed-state hiPSC line MRC5iPS was generated from the human fetal  
353 lung fibroblast cell line MRC-5<sup>33</sup> by retroviral transduction of reprogramming factors  
354 (Oct3/4, Sox2, Klf4, c-Myc)<sup>7</sup>. ALP activity was detected with VECTOR Red Alkaline  
355 Phosphatase Substrate Kit I (Cat. SK-5100, Vector Laboratories) according to the  
356 manufacturer's instructions.

357 The primed-state hESC line KhES-1 was maintained as previously described<sup>34</sup>.  
358 To test the effect of the Nmt inhibitor DDD85646<sup>14</sup> (provided by Dr. Paul Wyatt,  
359 University of Dundee, UK) on prime-state hESC, KhES-1 was passaged in 2i/LIF  
360 with or without the inhibitor and analyzed for gene expression.

361 For real-time PCR analysis of mESCs, MEF feeder cells were removed by  
362 plating cells on a gelatin-coated dish for 30 min during the passaging and collecting  
363 unattached cells. For real-time PCR analysis of the hESCs, MEF feeder cells were



364 removed by separating them from clumps of hESCs under gravity sedimentation  
365 during the passaging.

366

### 367 **Isolation of Nmt1-revertant Clones**

368 *Nmt1*-homozygous mESCs were transfected with pCAGGS-FLPo-IRESpuro<sup>35</sup> using  
369 TransFast (Cat. E2431, Promega) to excise the *FRT*-flanked gene trap cassette. Three  
370 days after transfection, mESCs were sparsely plated on MMC-treated MEFs for single  
371 cell cloning. One week later, single cell-derived mESC colonies were picked and  
372 divided into three culture conditions: (1) with G418 (Geneticin; Cat. 10131027,  
373 Thermo Fisher Scientific), (2) with puromycin (Cat. P7255, Sigma-Aldrich), and (3)  
374 without drug selection. The parental *Nmt1*-homozygous mESC clone expresses the  
375 neomycin-resistance gene and the puromycin-resistance gene from each allele.  
376 Therefore, reversion of both alleles confers sensitivity to both G418 and puromycin.

377

### 378 **Immunostaining**

379 For the immunostaining of Oct3/4 and Nanog, cells were fixed with 4%  
380 paraformaldehyde (Cat. 02890-45, Nacali Tesque) in PBS for 10 min, permeabilized  
381 with 0.2% Triton X-100 (Cat. 35501, Nacali Tesque) for 10 min, and subjected to  
382 blocking with 1% bovine serum albumin (BSA) (Cat A5611, Sigma-Aldrich) in PBS  
383 for 20 min. The following primary antibodies were used: anti-Oct3/4 mouse  
384 monoclonal antibody (1:300, clone c-10, Cat. Sc-5279, Santa Cruz Biotechnology)  
385 and anti-Nanog rabbit polyclonal antibody (1:200, Cat. RCAB002P-F, ReproCELL).  
386 Alexa Fluor 488-conjugated goat anti-mouse IgG (Cat. A-11001, Thermo Fisher

387 Scientific) and Alexa Fluor 594-conjugated goat anti-rabbit IgG (Cat. A-11012,  
388 Thermo Fisher Scientific) were used as a secondary antibody for Oct3/4 and Nanog,  
389 respectively, and DAPI (Cat. 62248, Thermo Fisher Scientific) was used for  
390 counterstaining. For the immunostaining of SUSD2, the cells were incubated with  
391 APC-conjugated anti-SUSD2 antibody (1:20, clone W5C5, Cat. 327401, BioLegend)  
392 for 30 min in culture medium. The cells were washed three times with PBS and  
393 analyzed by FACS Aria II (Becton, Dickinson and Company).

394

### 395 **Converting mEpiSCs to Naive-state mEpi-iPSCs**

396 mEpiSCs ( $2 \times 10^4$ ) were plated onto MMC-treated MEFs in N2B27-based medium  
397 supplemented with bFGF and activin A. The next day (day 0), the medium was  
398 changed to an N2B27-based 2i/LIF medium with or without the Nmt inhibitor  
399 (DDD85646) or the Src inhibitor (CGP77675) (Cat. 21089, Cayman Chemical). On  
400 day 2, the cells were passaged at 1:20 onto MEFs in the same medium. On day 7, the  
401 cells were passaged at 1:100 onto MEFs in 2i/LIF medium without inhibitors. On day  
402 15, the number of dome-shaped colonies were counted.

403

### 404 **Generating Chimeric Mice and Determining Germline Transmission**

405 After generating mEpi-iPSCs from mEpiSCs in serum-free 2i/LIF medium, we  
406 cultured them in serum-containing medium on MMC-treated MEFs for several days  
407 and injected them into eight cell stage embryos or blastocysts. We used ICR or  
408 BDF1-derived embryos as a host. Since the parental mEpiSCs were derived from a  
409 female 129SV mouse strain, we selected female agouti-colored chimeric mice and

410 crossed them with male C57BL/6J mice to test germline transmission. The germline  
411 transmission was judged by the agouti coat color of the progeny.

412

### 413 **Generating the Conditional Allele at the *Nmt1* Locus**

414 To conduct a conditional knockout of the *Nmt1* gene, we performed gene targeting and  
415 floxed the second exon of the *Wt* allele of the *Nmt1*-heterozygous mESC clone that we  
416 previously obtained by gene trapping<sup>11</sup>. The targeting vector was constructed as  
417 follows, and the PCR primer sequences are listed in Supplementary Table 1. We first  
418 PCR-amplified a genomic fragment of the first intron of the *Nmt1* gene, using primer  
419 pairs Nmt1-S-Upp1 and Nmt1-S-Low1, using the genomic DNA of the mESC line  
420 KY1.1<sup>36</sup> as a template, digested with NotI and SmaI, and cloned into the NotI-SmaI  
421 site of the pMulti-Lox5171-FRT-CAG-bsd-pA-FRT (unpublished), which contains the  
422 *FRT*-flanked blasticidin S deaminase expression cassette and a single copy of the  
423 *lox5171* site at this cloning site, resulting in the  
424 pMulti-Lox5171-FRT-CAG-bsd-pA-FRT-5HR. We next amplified the *Nmt1* genomic  
425 region spanning from the first intron to the second intron, using the primers  
426 Nmt1-L-Upp2 and Nmt1-L-Low2, and the genomic region spanning from the second  
427 intron to the third intron, using the primers Nmt1-L-Upp1 and Nmt1-L-Low1. These  
428 fragments have overlapped sequences containing the *lox5171* site introduced by PCR  
429 primers. We therefore conducted fusion PCR, using the mixture of these fragments as  
430 a template, and using primers Nmt1-L-Upp1 and Nmt1-L-Low2. The fused fragments  
431 were digested with AscI and PacI and cloned into the AscI-PacI site of the  
432 pMulti-Lox5171-FRT-CAG-bsd-pA-FRT-5HR, resulting in the targeting vector

433 pMulti-Lox5171-FRT-CAG-bsd-pA-FRT-5HR-3HR. The targeting vector was  
434 linearized with AscI, and 25  $\mu$ g of the targeting vector was transfected into  $1 \times 10^7$  of  
435 *Nmt1*-heterozygous cells<sup>11</sup> by electroporation (240 V, 500  $\mu$ F) with Gene Pulser II  
436 (Bio-Rad). One week later, blasticidin S-resistant clones were picked and screened for  
437 homologous recombinants by primers *Nmt1-sc1* and *bsd3-1*. Targeted clones were  
438 transfected with pCAGGS-FLPo-IRESpuro to remove the bsd cassette and generate  
439 the floxed *Nmt1* allele. The parental mESC line contained the *ERT2-iCre-ERT2* gene  
440 at the *Rosa26* locus<sup>11</sup>. Therefore, the conditional knockout of the *Nmt1* gene was  
441 achieved by treating cells with 4-hydroxytamoxifen (4HT) (Cat. H6278,  
442 Sigma-Aldrich). To confirm that the conditional allele was correctly generated, we  
443 treated mESCs with 1  $\mu$ M of 4HT overnight and analyzed Cre-mediated  
444 recombination by PCR, using primers *Nmt1-Flpo-Scn-F1* and *Nmt1-Flpo-Scn-R1* for  
445 detecting the undeleted allele, and primers *Nmt1-Flpo-Scn-F1* and *Nmt1-Cre-Scn-R1*  
446 for detecting the deleted allele. We also conducted PCR by mixing all three primers in  
447 order to suppress the amplification of MEF-derived genomic DNAs that could not be  
448 eliminated by plating on a gelatin-coated dish.

449

### 450 **Converting mESCs to mEpiSC-like Primed-state Cells**

451 mESCs carrying the floxed *Nmt1* allele were converted into mEpiSC-like primed-state  
452 cells according to the published protocol<sup>17</sup>. Briefly, mESCs were cultured in N2B27  
453 medium supplemented with 12 ng/ml of bFGF and 20 ng/ml of activin A on a dish  
454 coated with fibronectin (Cat. 354008, Corning), and passaged at every 3–5 days. The  
455 morphology of the cell clusters became gradually flatter. We analyzed the primed-state

456 marker *Fgf5* and the naive state marker *Dppa3* by qRT-PCR at passage nine to  
457 confirm conversion into the primed state.

458

### 459 **Converting mEpiSC-like Primed-state Cells to Naive-state mEpi-iPSCs by the** 460 **Conditional Knockout of *Nmt1***

461 mEpiSC-like primed-state cells were plated onto MMC-treated MEFs in N2B27-based  
462 medium supplemented with 12 ng/ml of bFGF and 20 ng/ml of activin A and treated  
463 with 1  $\mu$ M of 4HT for 12 hours to induce the Cre-mediated deletion of the *Nmt1* allele.

464 The same amount of ethanol was added to the medium as a mock. The cells were  
465 maintained in the same N2B27/bFGF/activin A medium for another five days to

466 reduce the intracellular concentration of *Nmt1* protein. Then, the cells were plated

467 onto MMC-treated MEFs in the same medium at the concentration of  $2 \times 10^4$  cells per

468 well. The next day (day 0), the medium was changed to 2i/LIF medium to induce

469 conversion to the naive state. On day 7, the cells were passaged at 1:70 onto MEFs.

470 On day 15, the cells were stained for ALP activity, using VECTOR Red Alkaline

471 Phosphatase Substrate Kit I (Cat. SK-5100, Vector Laboratories), according to the

472 manufacturer's instructions, and the number of ALP-positive colonies were counted.

473

### 474 **Quantitative RT-PCR (qRT-PCR)**

475 To quantify gene expression in the mouse cells, the total RNA was extracted with

476 RNeasy Plus Mini Kit (Cat. 74136, Qiagen) and reverse-transcribed with SuperScript

477 III (Cat. 18080044, Thermo Fisher Scientific), using random primers (Cat. C1181,

478 Promega). The expression levels of mRNAs encoding *Dppa3*, *Fgf5*, and *Actb* were

479 quantified by real-time PCR, using the LightCycler FastStart DNA Master SYBR  
480 Green I kit (Cat. 12239264001, Roche Diagnostics) on the LightCycler (Roche  
481 Diagnostics). The primer pairs are presented in Supplementary Table 1. The  
482 amplification conditions for *Dppa3* and *Fgf5* were 95 °C for 10 min for one cycle,  
483 followed by 40 cycles of denaturation at 95 °C for 10 sec, annealing at 56 °C for 5 sec  
484 and extension at 72 °C for 20 sec. The amplification conditions for *Actb* were the  
485 same except that the annealing temperature was 55 °C. The quantity of each transcript  
486 was measured from a standard curve, and the amounts of *Dppa3* and *Fgf5* transcript  
487 were normalized to *Actb* transcript levels.

488 To quantify gene expression in hESCs (KhES-1), the total RNA was extracted  
489 with RNeasy Micro Kit (Cat. 74004, Qiagen) and reverse-transcribed with an RT<sup>2</sup>  
490 First Strand Kit (Cat. 330404, Qiagen). The expression levels of the mRNAs were  
491 quantified using Human Embryonic Stem Cell RT<sup>2</sup> Profile™ PCR Array (Cat.  
492 PAHS-081, Qiagen) and RT<sup>2</sup> SYBR Green qPCR Master Mix (Cat. 330504, Qiagen).  
493 All procedures followed the manufacturer's instructions.

494

### 495 **Analysis of the Localization of the myrVenus Reporter**

496 The myrVenus reporter<sup>15</sup> was cloned into the piggyBac transposon vector<sup>37</sup> under the  
497 control of the CAG promoter<sup>38</sup> and with the IRES-bsd selection cassette. This vector  
498 was introduced into mESCs by co-transfecting the piggyBac expression vector mPB<sup>37</sup>,  
499 using TransFast transfection reagent, and selected by 30 µg/ml of blasticidin S (Cat.  
500 KK-400, Kaken Pharmaceutical). We stained the plasma membrane using CellMask  
501 Deep Red Plasma Membrane Stain (Cat. C10046, Thermo Fisher Scientific) according

502 to the manufacturer's instructions and fixed the cells with 4% of paraformaldehyde.

503 We captured the fluorescent images and conducted a line-plot analysis of the

504 fluorescence signal using DeltaVision Elite (Cytiva).

505

## 506 **Statistical Analysis**

507 The student's *t*-test was conducted to compare the two groups, the Tukey-Kramer test

508 was used for multiple comparisons between all samples, and Dunnett test for multiple

509 comparisons was used for comparisons with a specific sample.

510

## 511 **AUTHOR CONTRIBUTIONS**

512 Conceptualization, K.H. and J.T.; Methodology, J.Y. and K.H; Investigation, J.Y.,

513 H.W., K.Y., T.N., A.I., H.A., H.S., Y.T., G.K., K.H.; Writing – Original Draft, K.H.;

514 Resources, S.O., H.N. and Y.T.; Supervision, H.A., A.U., H.S., J.T. and K.H.; Project

515 Administration, J.T. and K.H.; Funding Acquisition, Y.T. and K.H.

516

## 517 **ACKNOWLEDGMENTS**

518 We thank Dr. Paul Wyatt at the Drug Discovery Unit, School of Life Sciences,

519 University of Dundee for providing DDD85646 (prepared with the support of

520 Wellcome Trust grant WT 077705). We also thank Dr. Paul Tesar at Case Western

521 Reserve University for the mEpiSCs, Dr. Kat Hadjantonakis at Sloan Kettering

522 Institute for the myrVenus reporter vector, and Dr. Masaru Okabe for supporting

523 generating chimeric mice. This work was supported by Grants-in-Aid for Scientific

524 Research from the Ministry of Education, Culture, Sports, Science, and Technology of

525 Japan (JP16H04683, JP18K19275, JP20H03174 for K.H.), JST PRESTO (K.H.),  
526 AMED (JP20bm0704035 for Y.T.), and the Cooperative Research Program (Joint  
527 Usage/Research Center program) of Institute for Frontier Life and Medical Sciences,  
528 Kyoto University (K.H.). This work was also supported in part by the research grant  
529 from the Takeda Science Foundation (K.H.), Naito Foundation (K.H.), and Daiichi  
530 Sankyo Foundation of Life Science (K.H.).

531

## 532 **FIGURE LEGENDS**

533 **Figure. 1. Disruption of *Nmt1* confers differentiation resistance to mESCs and**  
534 **enhances properties of the naive state.**

535 (A) Morphological differences between wild-type (*Wt*) and *Nmt1*-homozygous mutant  
536 (*Nmt1<sup>m/m</sup>*) mESC colonies in serum/LIF medium. mESCs were sparsely plated on  
537 MEFs to obtain single cell-derived colonies. Flat (black arrowhead) or small-sized  
538 (white arrowhead) colonies were observed in *Wt* mESCs, whereas *Nmt1<sup>m/m</sup>* mESCs  
539 were more homogeneous in shape and size and noticeably dome-shaped. Scale bar:  
540 500  $\mu$ m. (B) Oct3/4-staining of mESCs cultured for 12 days in serum/LIF medium  
541 without MEFs. *Nmt1<sup>m/m</sup>* mESCs formed compact colonies with homogeneous  
542 Oct3/4-staining whereas *Wt* mESCs exhibited irregular-shaped colonies with scattered  
543 cells. Note that some *Wt* mESCs are enlarged and negative for Oct3/4 (arrowheads),  
544 indicating differentiation. Scale bar: 50  $\mu$ m. (C) Reversion of the  
545 differentiation-resistant phenotype by deletion of the gene trap vector sequence. (Top)  
546 Generation of the revertant allele (*Nmt1<sup>r</sup>*) from the mutant allele (*Nmt1<sup>m</sup>*) by FLP/*FRT*  
547 recombination. (Middle, Bottom) Differentiation-resistant phenotype in each genotype.



548 Six hundred mESCs were plated on MEFs in serum-containing medium without LIF,  
549 and the number of undifferentiated colonies was determined by ALP-staining. Data  
550 are shown as mean  $\pm$  SEM ( $n=3$ , biological replicates). Tukey-Kramer test; \*\*\*  $p <$   
551 0.001; NS  $>$  0.05. E, exon; LTR, long terminal repeat; SA, splice acceptor; *hyg*,  
552 hygromycin-resistance gene; pA, polyadenylation signal; Pr, *Pgk1* promoter; N,  
553 neomycin-resistance gene; P, fusion gene of the puromycin-resistance gene and the  
554 herpes simplex virus thymidine kinase gene. Arrows below the gene trap vector  
555 indicates the orientation of each selection marker. (D) Morphological differences in  
556 single cell-derived colonies between *Wt* and *Nmt1<sup>m/m</sup>* mESCs in serum-free 2i medium  
557 without LIF and MEFs. Note that *Nmt1<sup>m/m</sup>* mESC colonies are noticeably  
558 dome-shaped compared to *Wt* mESC colonies. Scale bar: 500  $\mu$ m.

559

560 **Figure 2. Conversion of primed-state mEpiSCs into mESC-like naive-state cells**  
561 **by the Nmt inhibitor.**

562 (A) Schematic of translation, myristoylation and membrane targeting of the  
563 *N*-myristoylation signal-containing Venus reporter (myrVenus). (B) The effect of the  
564 Nmt inhibitor DDD85646 on subcellular localization of myrVenus in mESCs. Line  
565 plots indicate the relative fluorescence intensity of myrVenus and membrane staining  
566 along the white arrow shown in the overlaid picture. The plasma membrane  
567 localization of myrVenus is decreased in the presence of the Nmt inhibitor. Scale bar:  
568 10  $\mu$ m. (C) Schematic of the protocol for the conversion of primed-state mEpiSCs into  
569 the mESC-like naive state. (D) Cells viewed at day 7 with or without the Nmt  
570 inhibitor. Dome-shaped mESC-like colonies were observed in the presence of the Nmt

571 inhibitor. Scale bar: 200  $\mu\text{m}$ . (E) Immunostaining of cells cultured under 2i/LIF + Nmt  
572 inhibitor. Dome-shaped colonies were positive for the pluripotency markers Oct3/4  
573 and Nanog. Scale bar: 50  $\mu\text{m}$ . (F) The number of dome-shaped colonies at day 15.  
574 Data are shown as mean  $\pm$  SEM ( $n=3$ , biological replicates). Unpaired student's *t*-test;  
575 \*\*\*  $p < 0.001$ . (G) mESC-like cells stably maintained under 2i/LIF without the Nmt  
576 inhibitor. Scale bar: 500  $\mu\text{m}$ . (H) mRNA expression of the naive-state marker *Dppa3*  
577 and the primed-state marker *Fgf5*. mEpi-iPSC indicates mESC-like cell induced from  
578 mEpiSC. Data are shown as mean  $\pm$  SEM ( $n=3$ , biological replicates). Dunnett test; \*\*  
579  $p < 0.01$ , \*\*\*  $p < 0.001$ , NS  $> 0.05$ . (I) Germline transmission of mEpi-iPSCs. An  
580 asterisk indicates a female parent chimera, and arrows denote agouti color-coated  
581 offspring.

582

583 **Figure 3. Verification of the effect of Nmt1 deficiency by conditional gene**  
584 **knockout.**

585 (A) Outline of the generation of genetically modified mEpiSC-like cells and  
586 conversion to naive-state mEpi-iPSCs by conditional knockout of Nmt1. 4HT,  
587 4-hydroxytamoxifen. (B) PCR analysis of the 4HT-induced deletion of the *Nmt1* gene.  
588 Primer pairs are depicted in (A). PCR bands derived from the *Nmt1*-floxed allele and  
589 the 4HT-induced deleted allele are indicated by yellow and blue arrowheads,  
590 respectively. M, 100-bp size marker. (C) Effect of *Nmt1* knockout on subcellular  
591 localization of the myrVenus reporter. Line plots indicate the relative fluorescence  
592 intensity of myrVenus and membrane staining along the white arrows shown in the  
593 overlaid picture. Plasma membrane localization is decreased by 4HT-induced

594 conditional knockout. Scale bar: 10  $\mu\text{m}$ . (D) A morphological view of mEpiSC-like  
595 cells induced from mESCs by continuous culturing under bFGF and activin A at  
596 passage 9. Scale bar: 100  $\mu\text{m}$ . (E) Confirmation of the acquisition of the primed-state  
597 features in mEpiSC-like cells shown in (D). P0, passage 0; P9, passage 9. (F)  
598 Schematic of the protocol for the conversion of primed-state mEpiSC-like cells into  
599 the naive-state mEpi-iPSCs. (G) (Left) ALP-staining of the colonies after the  
600 conversion process. (Middle) Examples of ALP-positive colonies before and after  
601 ALP-staining. Scale bar: 500  $\mu\text{m}$ . (Right) Number of ALP-positive colonies are  
602 shown as mean  $\pm$  SEM ( $n=3$ , biological replicates). Note that no ALP-positive colony  
603 was obtained in mock-treatment. Unpaired student's  $t$ -test; \*\*\*\*  $p < 0.001$ .

604

605 **Figure 4. The effect of the Nmt inhibitor on the conversion of the primed to naive**  
606 **state is not mediated by Src signaling pathways.**

607 (A) Schematic of the protocol for the comparison of the primed- to naive-state  
608 conversion efficiency between the Nmt inhibitor DDD85464 and the Src inhibitor  
609 CGP77675. (B) A morphological view of the cells during the primed- to naive-state  
610 conversion. Scale bar: 500  $\mu\text{m}$  (C) The number of dome-shaped colonies at day 15.  
611 Data are shown as mean  $\pm$  SEM ( $n=3$ , biological replicates). Tukey-Kramer test; \*\*\*  $p$   
612  $< 0.001$ .

613

614 **Figure 5. Inhibition of Nmt promotes the naive state in hiPSCs.**

615 (A) Morphology of naive hiPSCs and the expression of the EOS-GFP reporter. Scale  
616 bar: 100  $\mu\text{m}$ . (B) Expression of naive-state maker SUSD2. MEF feeders could be

617 excluded from the naive hiPSC culture by gating the expression of SUSD2. (C) The  
618 expression of EOS-GFP in the SUSD2-positive population shown in (B). Negative  
619 control is primed-state hiPSC without gating. (D, E) Dose-dependent effect of the  
620 Nmt inhibitor DDD85646 on the expression of EOS-GFP in naive hiPSCs. Note that  
621 different hiPSC lines were used in (D) and (E). (F) Long-term effect of the Nmt  
622 inhibitor on EOS-GFP expression. The mean fluorescence intensity of EOS-GFP is  
623 shown as mean  $\pm$  SEM ( $n=3$ , biological replicates). Unpaired student's  $t$ -test; \*\*\*  $p <$   
624 0.001.

625

## 626 REFERENCES

- 627 1. Rossant J, Tam PPL. New Insights into Early Human Development: Lessons for Stem  
628 Cell Derivation and Differentiation. *Cell Stem Cell* **20**, 18-28 (2017).  
629
- 630 2. Evans MJ, Kaufman MH. Establishment in culture of pluripotential cells from mouse  
631 embryos. *Nature* **292**, 154-156 (1981).  
632
- 633 3. Martin GR. Isolation of a pluripotent cell line from early mouse embryos cultured in  
634 medium conditioned by teratocarcinoma stem cells. *Proc Natl Acad Sci U S A* **78**,  
635 7634-7638 (1981).  
636
- 637 4. Tesar PJ, *et al.* New cell lines from mouse epiblast share defining features with  
638 human embryonic stem cells. *Nature* **448**, 196-199 (2007).  
639
- 640 5. Brons IG, *et al.* Derivation of pluripotent epiblast stem cells from mammalian  
641 embryos. *Nature* **448**, 191-195 (2007).  
642
- 643 6. Thomson JA, *et al.* Embryonic stem cell lines derived from human blastocysts.  
644 *Science (New York, NY)* **282**, 1145-1147 (1998).  
645
- 646 7. Takahashi K, *et al.* Induction of pluripotent stem cells from adult human fibroblasts  
647 by defined factors. *Cell* **131**, 861-872 (2007).  
648

- 649 8. Yu J, *et al.* Induced pluripotent stem cell lines derived from human somatic cells.  
650 *Science (New York, NY)* **318**, 1917-1920 (2007).  
651
- 652 9. Takashima Y, *et al.* Resetting transcription factor control circuitry toward  
653 ground-state pluripotency in human. *Cell* **158**, 1254-1269 (2014).  
654
- 655 10. Theunissen TW, *et al.* Systematic identification of culture conditions for induction  
656 and maintenance of naive human pluripotency. *Cell Stem Cell* **15**, 471-487 (2014).  
657
- 658 11. Horie K, *et al.* A homozygous mutant embryonic stem cell bank applicable for  
659 phenotype-driven genetic screening. *Nat Methods* **8**, 1071-1077 (2011).  
660
- 661 12. Yuan M, *et al.* N-myristoylation: from cell biology to translational medicine. *Acta*  
662 *pharmacologica Sinica* **41**, 1005-1015 (2020).  
663
- 664 13. Ying QL, *et al.* The ground state of embryonic stem cell self-renewal. *Nature* **453**,  
665 519-523 (2008).  
666
- 667 14. Frearson JA, *et al.* N-myristoyltransferase inhibitors as new leads to treat sleeping  
668 sickness. *Nature* **464**, 728-732 (2010).  
669
- 670 15. Rhee JM, *et al.* In vivo imaging and differential localization of lipid-modified  
671 GFP-variant fusions in embryonic stem cells and mice. *Genesis* **44**, 202-218 (2006).  
672
- 673 16. Casanova E, Fehsenfeld S, Lemberger T, Shimshek DR, Sprengel R, Mantamadiotis T.  
674 ER-based double iCre fusion protein allows partial recombination in forebrain.  
675 *Genesis* **34**, 208-214 (2002).  
676
- 677 17. Guo G, *et al.* Klf4 reverts developmentally programmed restriction of ground state  
678 pluripotency. *Development* **136**, 1063-1069 (2009).  
679
- 680 18. Yang SH, *et al.* N-myristoyltransferase 1 is essential in early mouse development. *J*  
681 *Biol Chem* **280**, 18990-18995 (2005).  
682
- 683 19. Shimizu T, *et al.* Dual inhibition of Src and GSK3 maintains mouse embryonic stem  
684 cells, whose differentiation is mechanically regulated by Src signaling. *Stem Cells* **30**,  
685 1394-1404 (2012).  
686
- 687 20. Guo G, *et al.* Epigenetic resetting of human pluripotency. *Development* **144**,  
688 2748-2763 (2017).

689

690 21. Bredenkamp N, Stirparo GG, Nichols J, Smith A, Guo G. The Cell-Surface Marker  
691 Sushi Containing Domain 2 Facilitates Establishment of Human Naive Pluripotent  
692 Stem Cells. *Stem Cell Reports* **12**, 1212-1222 (2019).

693

694 22. Yang J, van Oosten AL, Theunissen TW, Guo G, Silva JC, Smith A. Stat3 activation is  
695 limiting for reprogramming to ground state pluripotency. *Cell Stem Cell* **7**, 319-328  
696 (2010).

697

698 23. Meyn MA, 3rd, Schreiner SJ, Dumitrescu TP, Nau GJ, Smithgall TE. SRC family  
699 kinase activity is required for murine embryonic stem cell growth and differentiation.  
700 *Mol Pharmacol* **68**, 1320-1330 (2005).

701

702 24. Meyn MA, 3rd, Smithgall TE. Chemical genetics identifies c-Src as an activator of  
703 primitive ectoderm formation in murine embryonic stem cells. *Sci Signal* **2**, ra64  
704 (2009).

705

706 25. Thinon E, *et al.* Global profiling of co- and post-translationally N-myristoylated  
707 proteomes in human cells. *Nat Commun* **5**, 4919 (2014).

708

709 26. Spassov DS, Ruiz-Saenz A, Piple A, Moasser MM. A Dimerization Function in the  
710 Intrinsically Disordered N-Terminal Region of Src. *Cell Rep* **25**, 449-463 e444  
711 (2018).

712

713 27. Le Roux AL, *et al.* A Myristoyl-Binding Site in the SH3 Domain Modulates c-Src  
714 Membrane Anchoring. *iScience* **12**, 194-203 (2019).

715

716 28. Kimura A, Kurata Y, Nakabayashi J, Kagawa H, Hirano H. N-Myristoylation of the  
717 Rpt2 subunit of the yeast 26S proteasome is implicated in the subcellular  
718 compartment-specific protein quality control system. *Journal of proteomics* **130**,  
719 33-41 (2016).

720

721 29. Martin DD, *et al.* Rapid detection, discovery, and identification of post-translationally  
722 myristoylated proteins during apoptosis using a bio-orthogonal azidomyristate analog.  
723 *FASEB J* **22**, 797-806 (2008).

724

725 30. Kobayashi T, *et al.* Generation of rat pancreas in mouse by interspecific blastocyst  
726 injection of pluripotent stem cells. *Cell* **142**, 787-799 (2010).

727

728 31. De Los Angeles A, Pho N, Redmond DE, Jr. Generating Human Organs via  
729 Interspecies Chimera Formation: Advances and Barriers. *The Yale journal of biology*

- 730            *and medicine* **91**, 333-342 (2018).  
731
- 732    32.    Hotta A, *et al.* Isolation of human iPS cells using EOS lentiviral vectors to select for  
733            pluripotency. *Nat Methods* **6**, 370-376 (2009).  
734
- 735    33.    Jacobs JP, Jones CM, Baille JP. Characteristics of a human diploid cell designated  
736            MRC-5. *Nature* **227**, 168-170 (1970).  
737
- 738    34.    Suemori H, Yasuchika K, Hasegawa K, Fujioka T, Tsuneyoshi N, Nakatsuji N.  
739            Efficient establishment of human embryonic stem cell lines and long-term  
740            maintenance with stable karyotype by enzymatic bulk passage. *Biochem Biophys Res*  
741            *Commun* **345**, 926-932 (2006).  
742
- 743    35.    Kranz A, *et al.* An improved Flp deleter mouse in C57Bl/6 based on Flpo  
744            recombinase. *Genesis* **48**, 512-520 (2010).  
745
- 746    36.    Yagita K, *et al.* Development of the circadian oscillator during differentiation of  
747            mouse embryonic stem cells in vitro. *Proc Natl Acad Sci U S A* **107**, 3846-3851  
748            (2010).  
749
- 750    37.    Cadinanos J, Bradley A. Generation of an inducible and optimized piggyBac  
751            transposon system. *Nucleic Acids Res* **35**, e87 (2007).  
752
- 753    38.    Niwa H, Yamamura K, Miyazaki J. Efficient selection for high-expression  
754            transfectants with a novel eukaryotic vector. *Gene* **108**, 193-199 (1991).  
755  
756

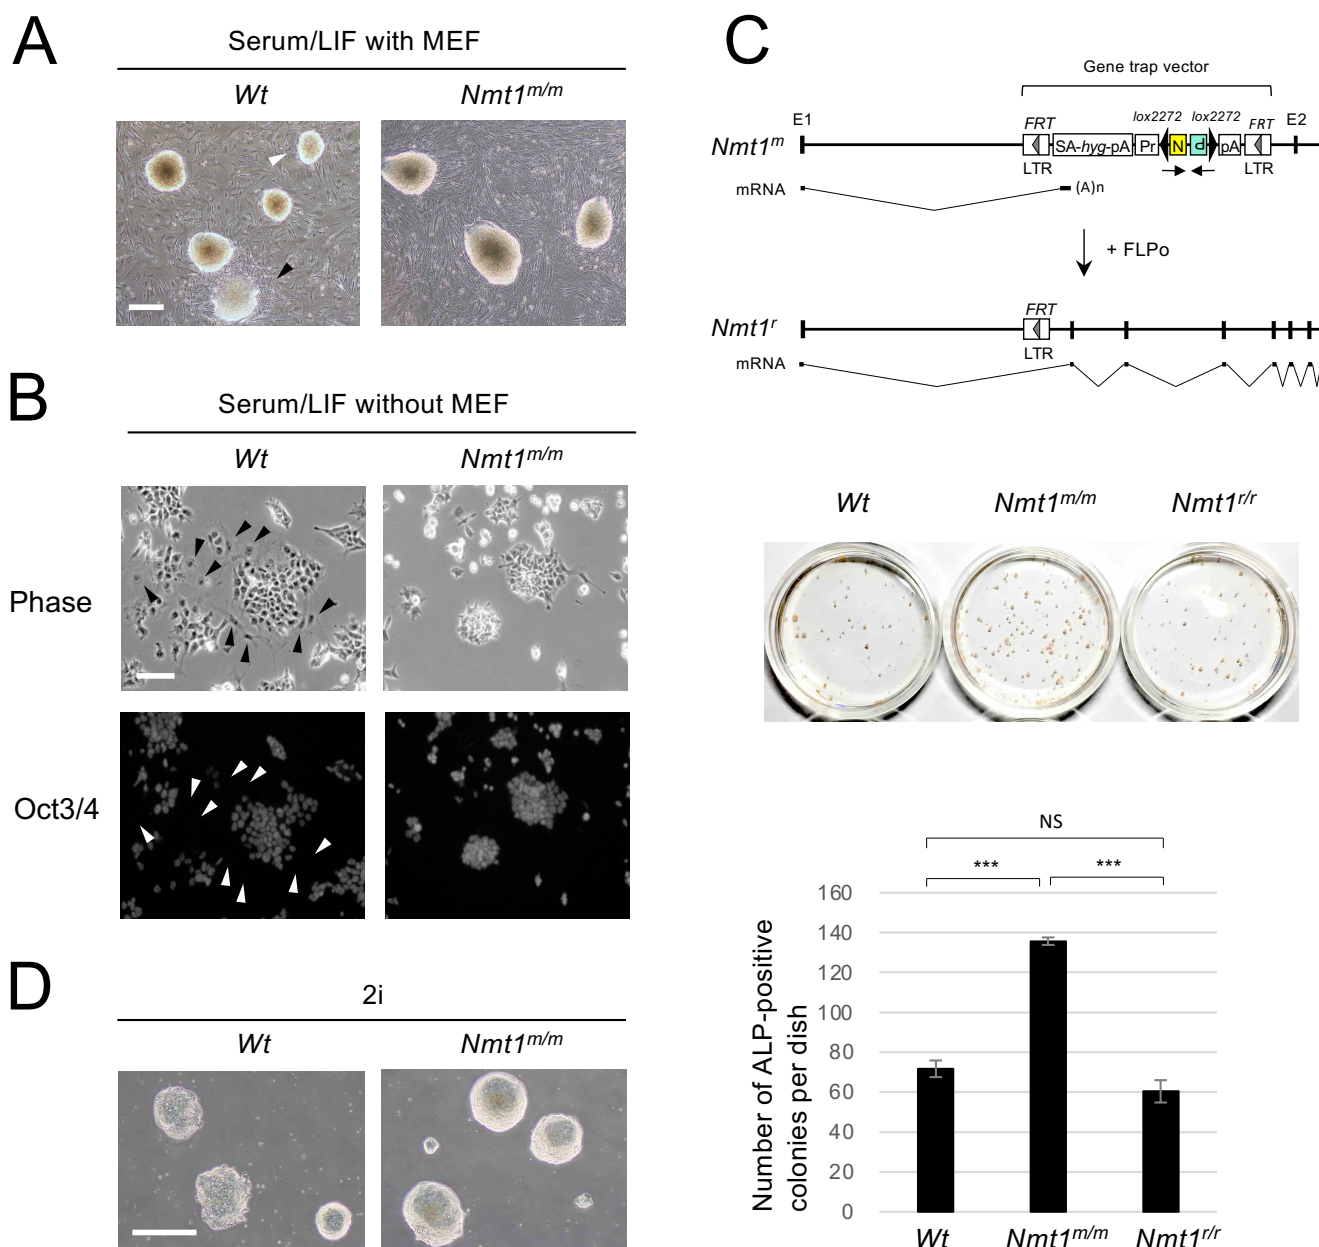

Fig. 1



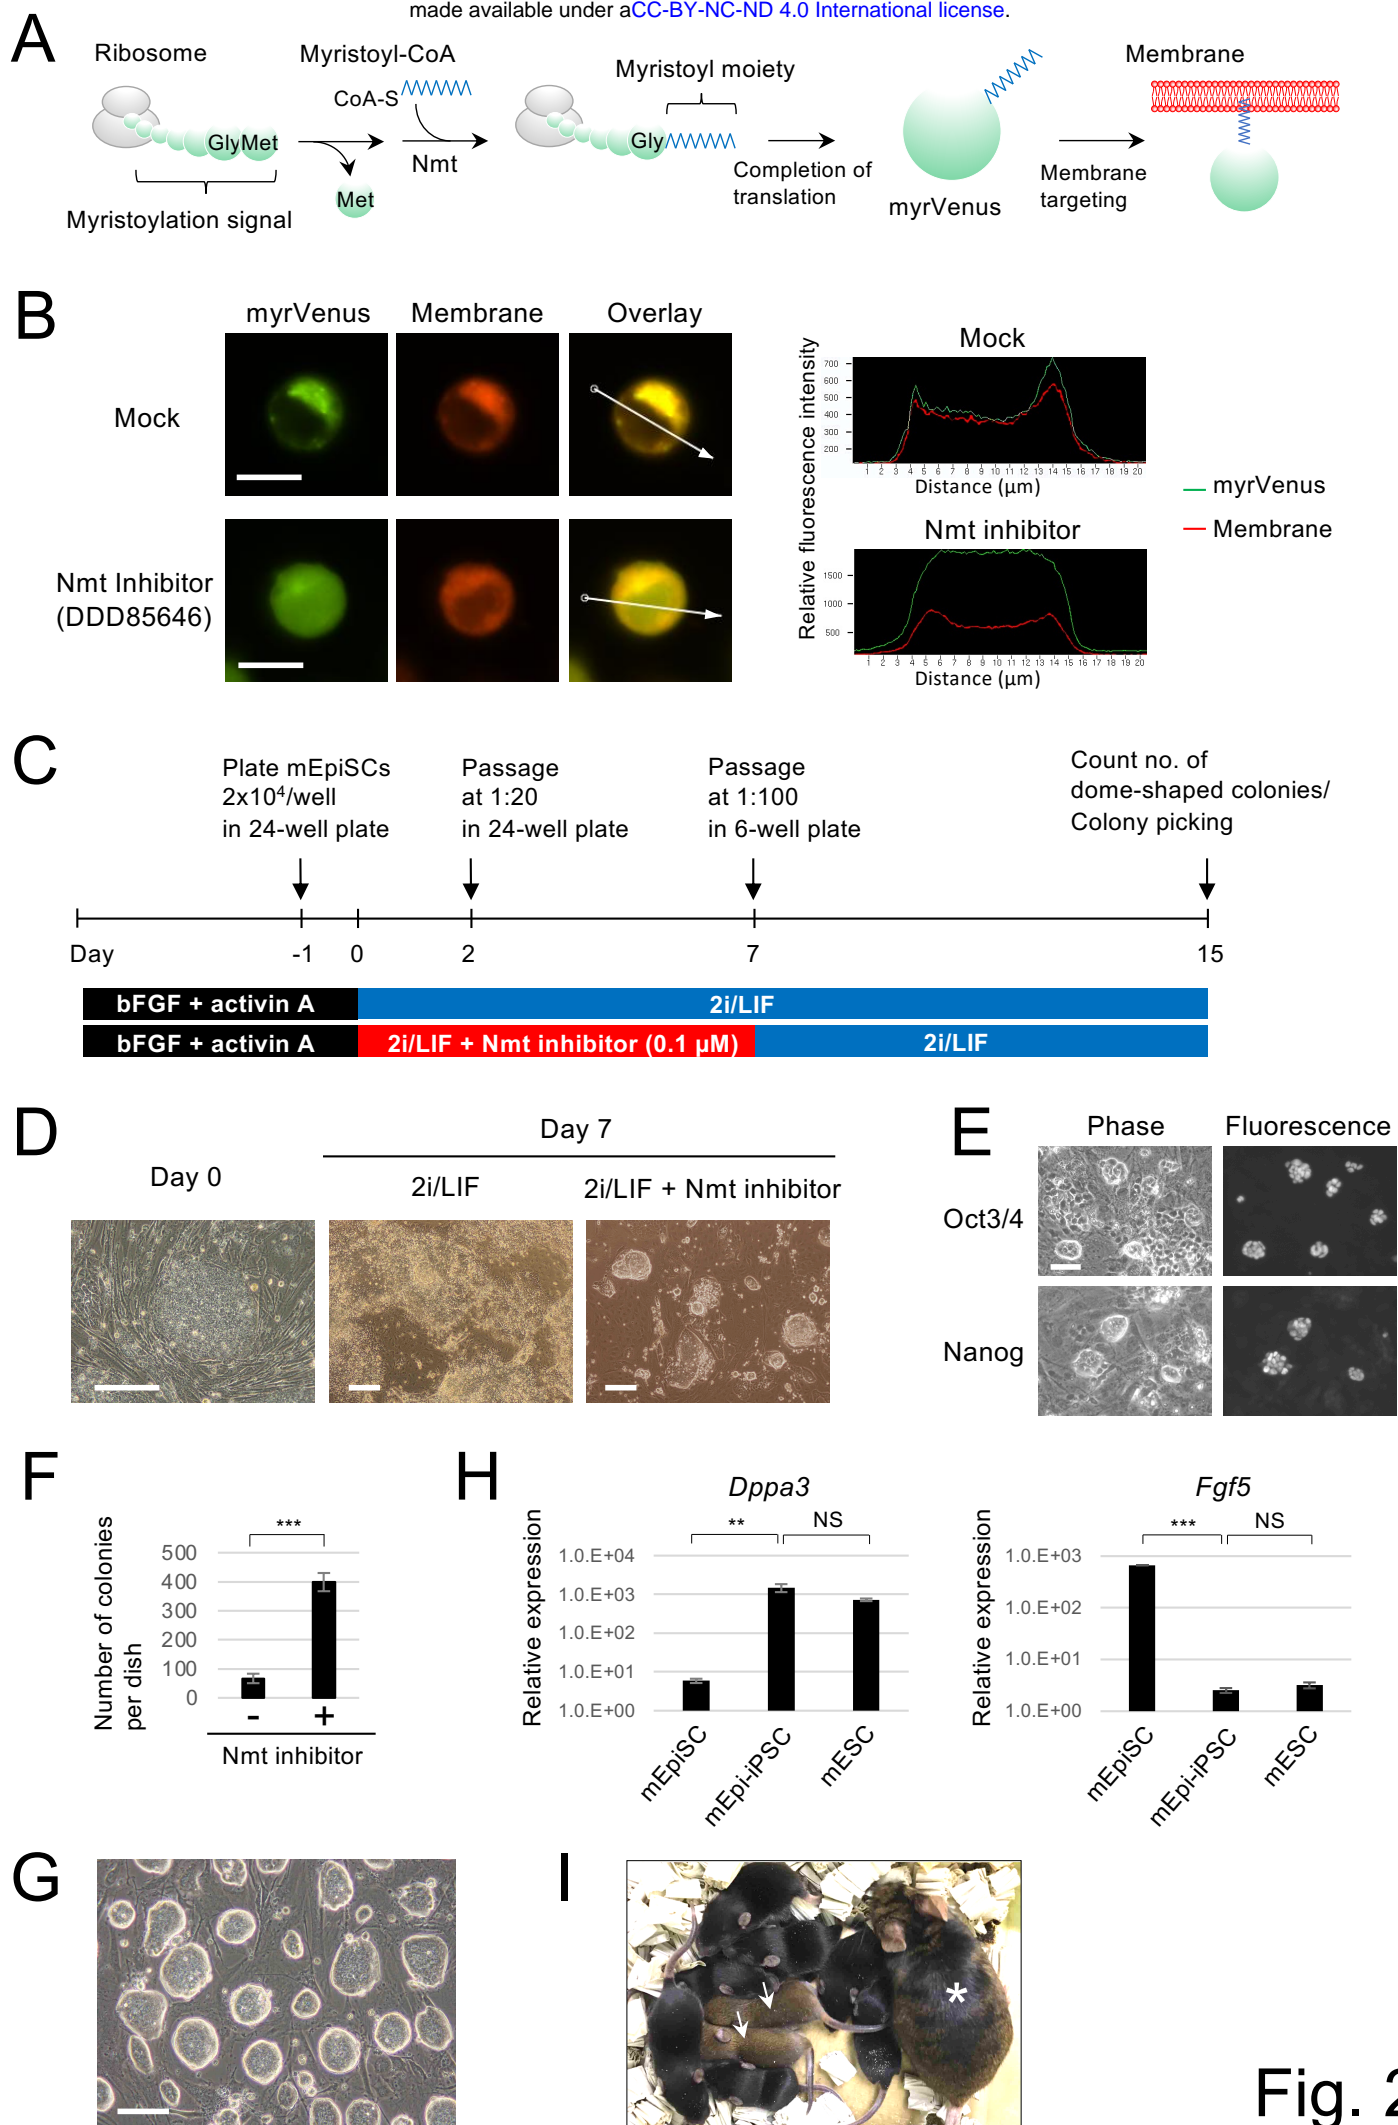

Fig. 2

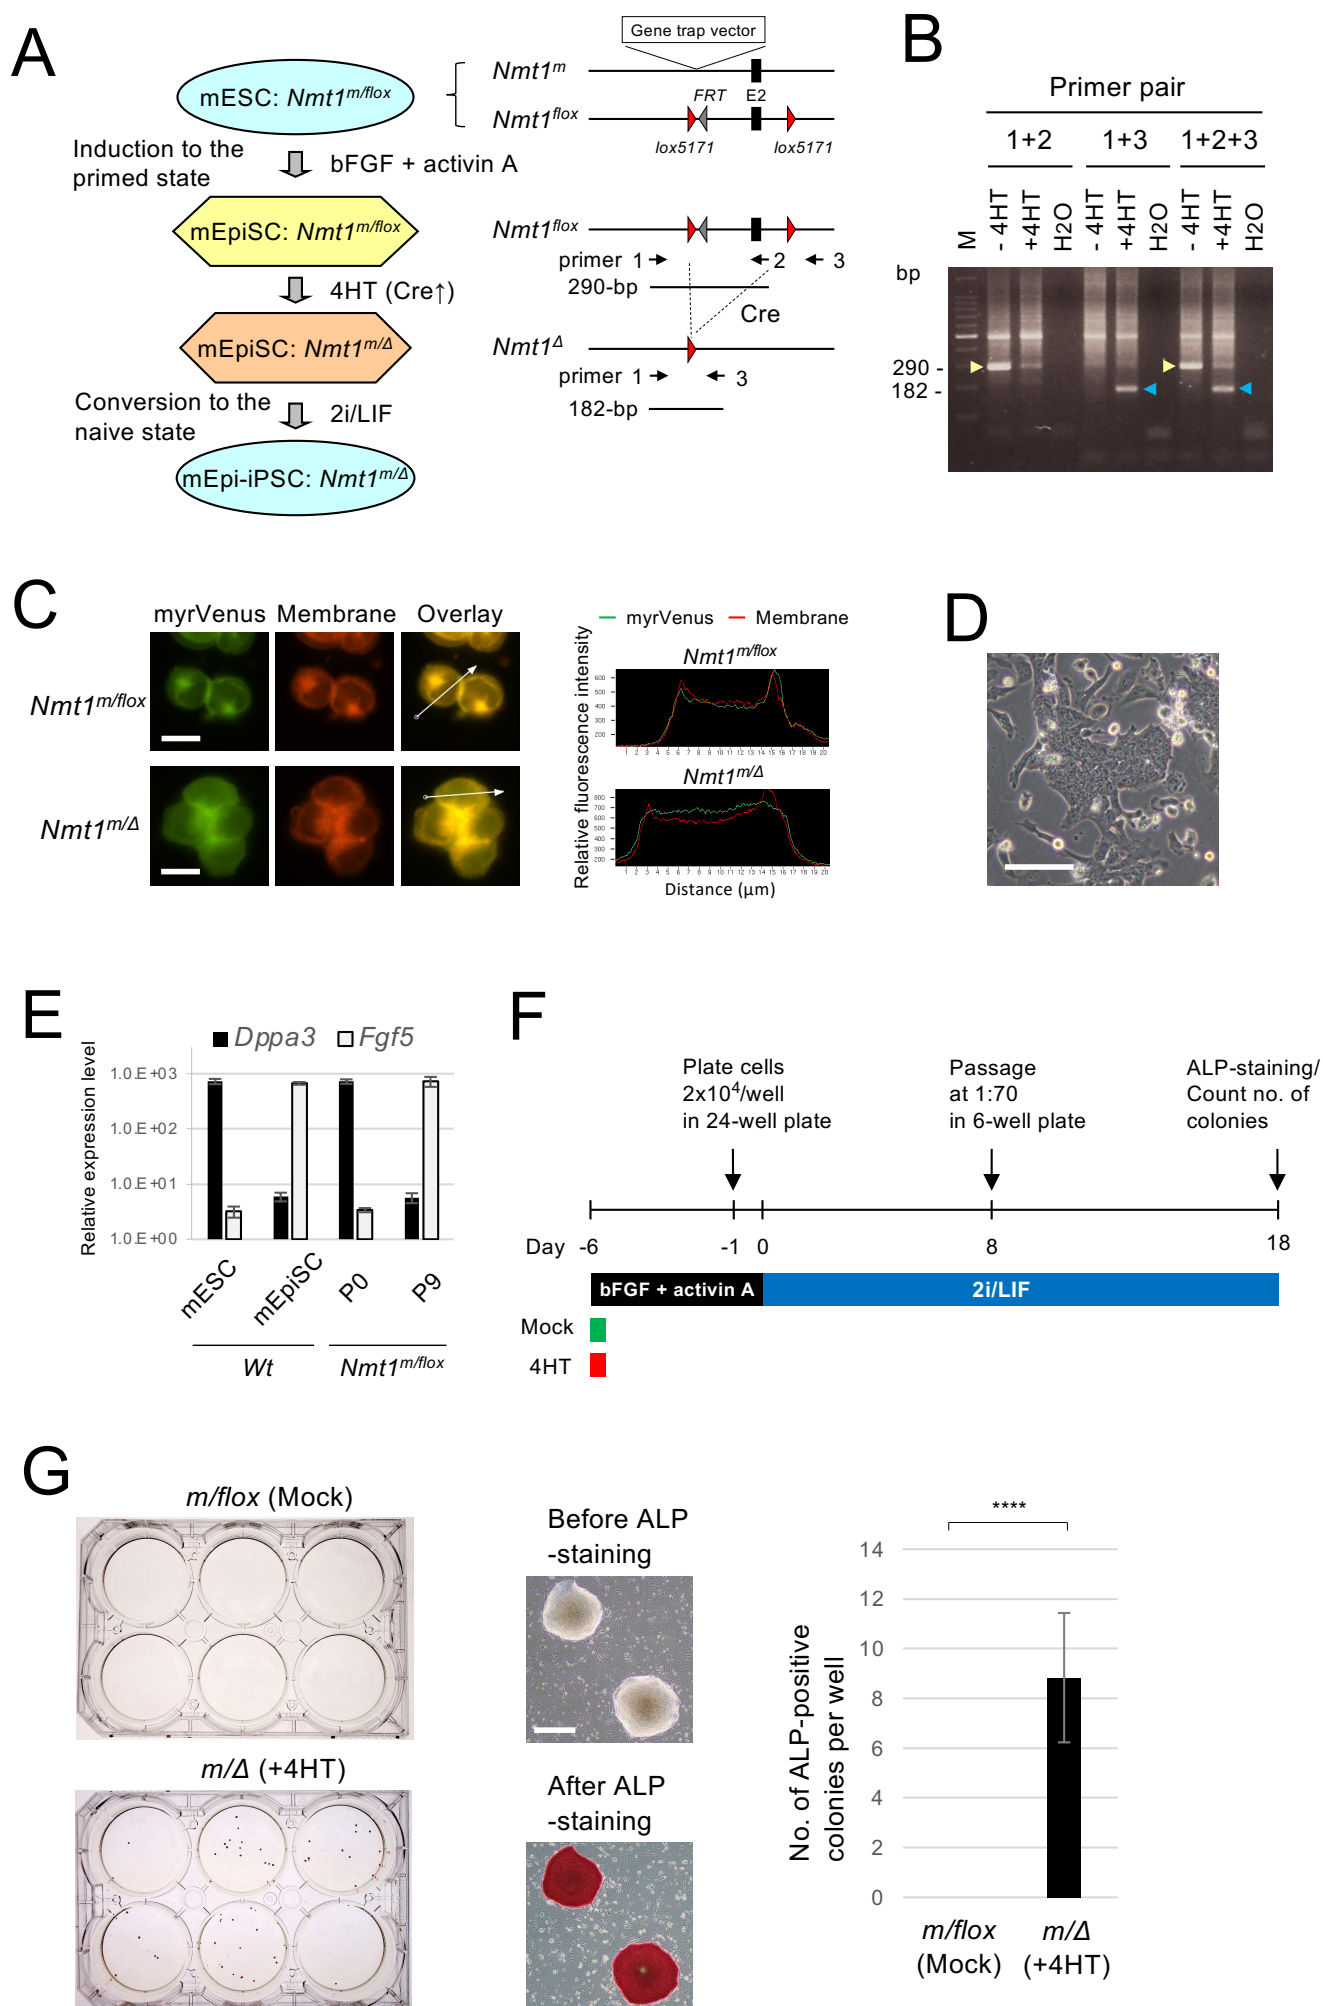

Fig. 3

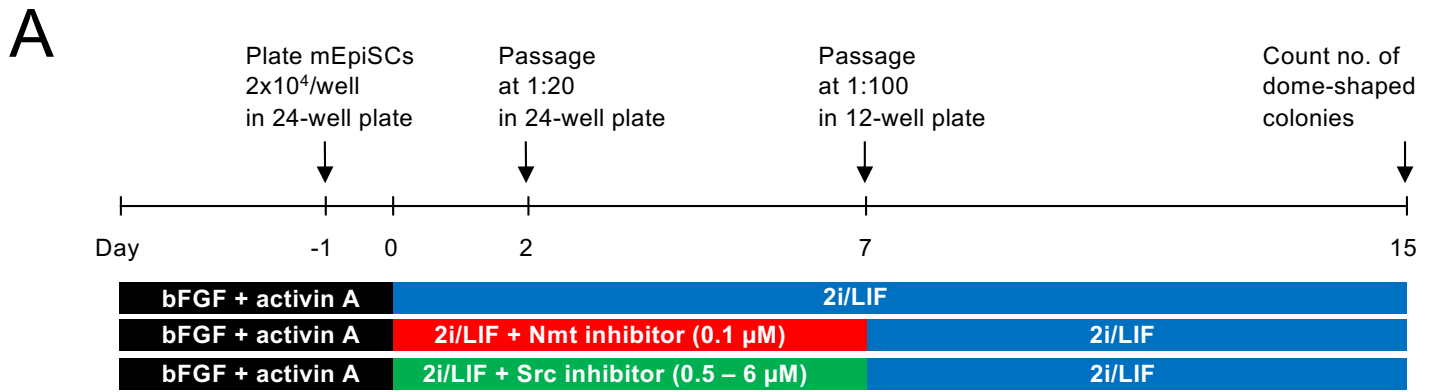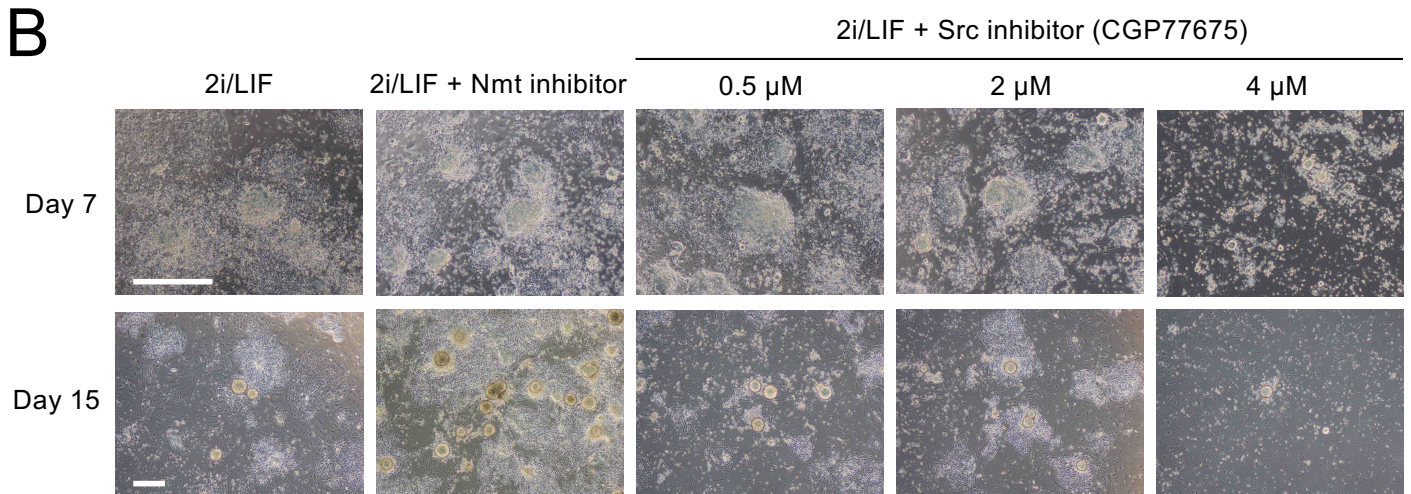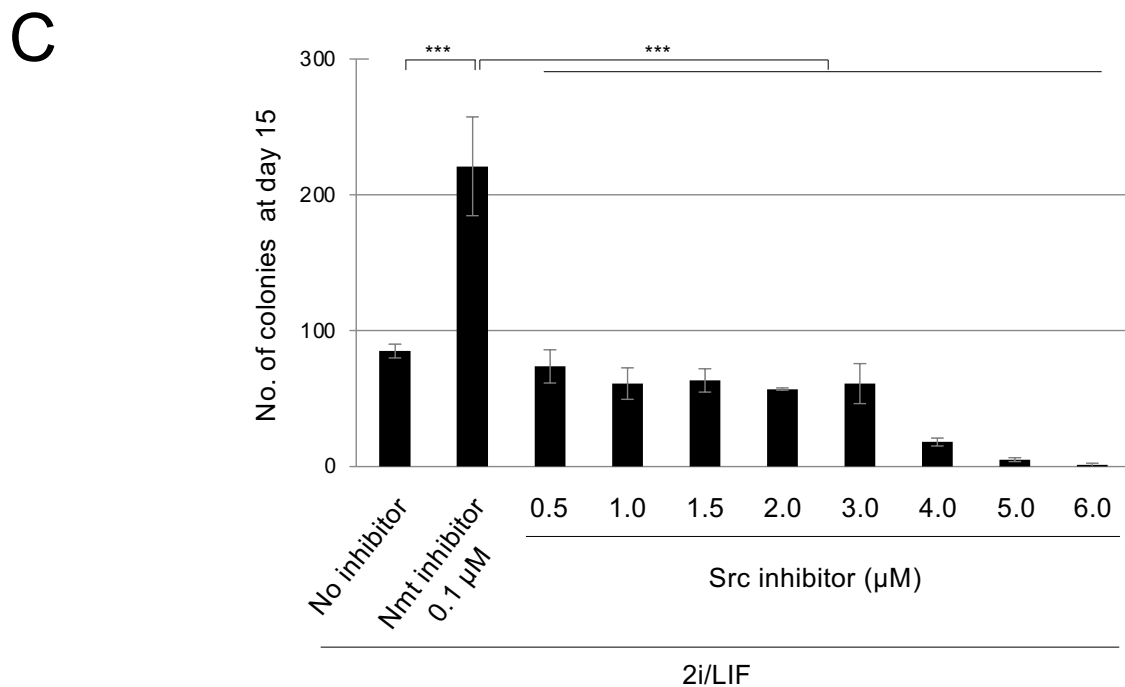

Fig. 4

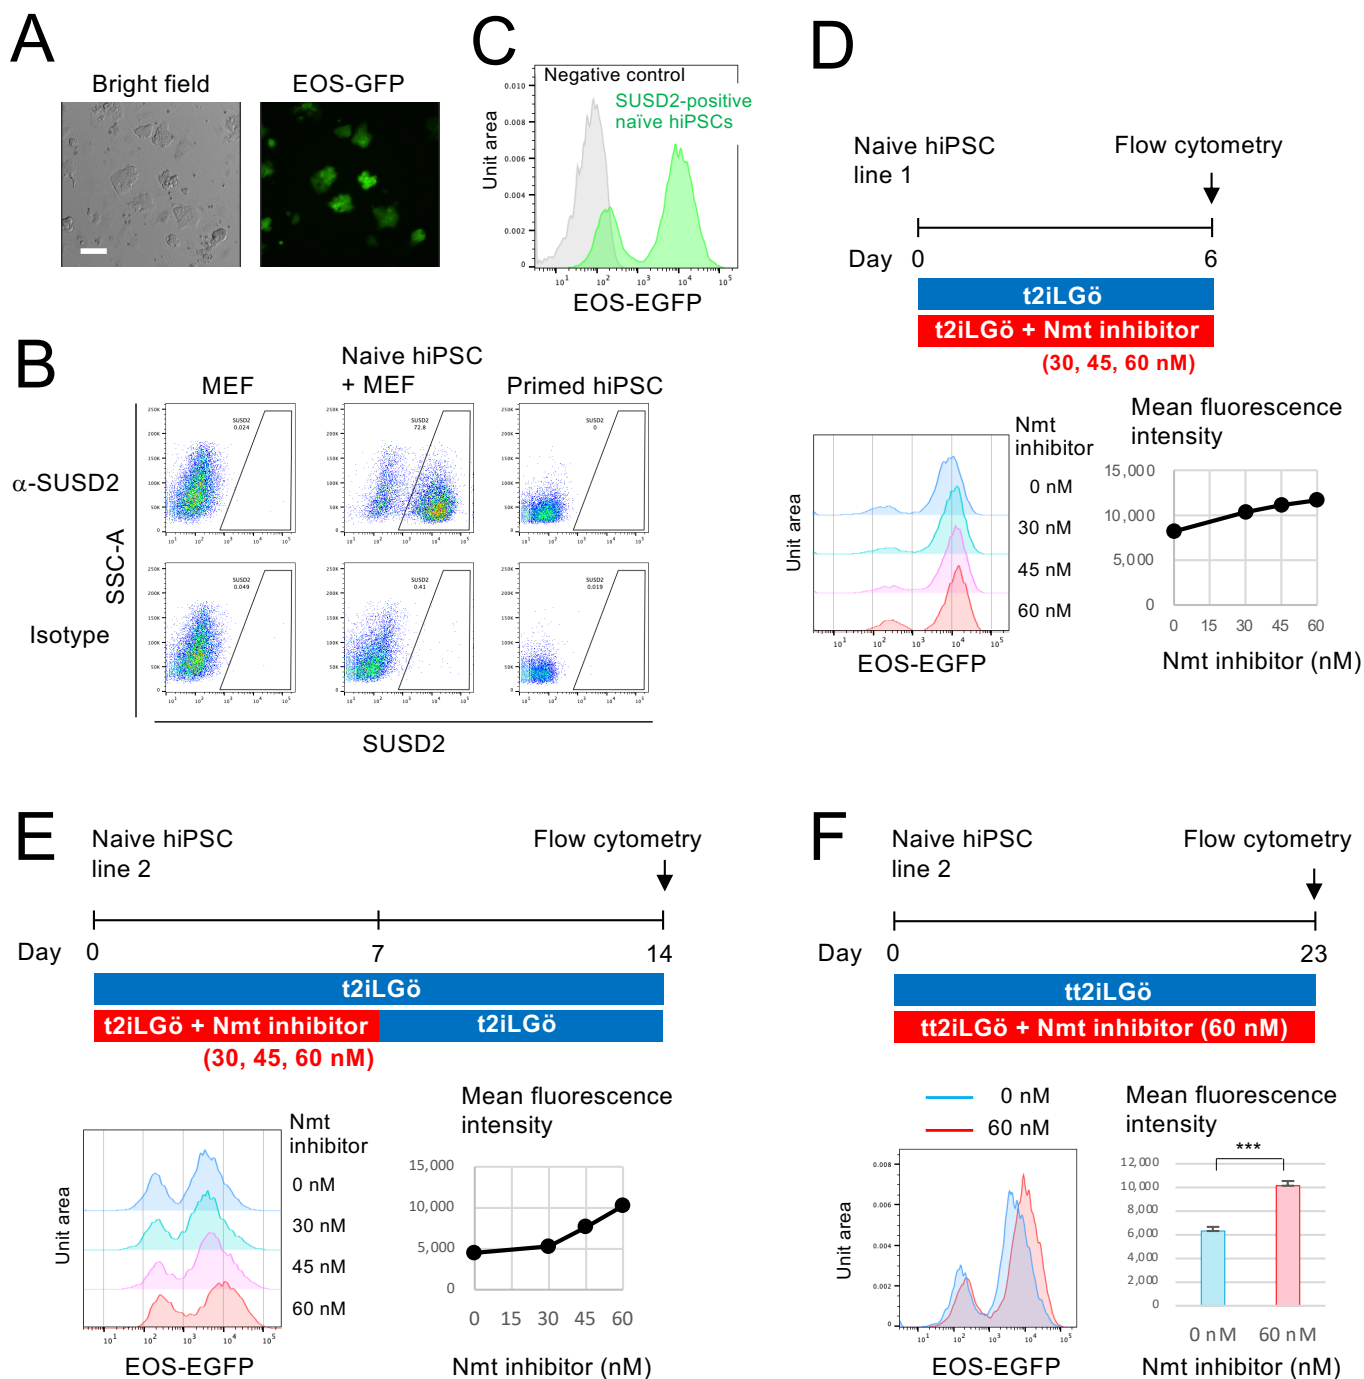

Fig. 5
